# Supplementary material
Source: Springer Nature journal article supplement (https://www.springermedizin.de/resource/supplementary/12889_2007_1091_MOESM2_ESM.pdf/9502432)

Prevalence [%]

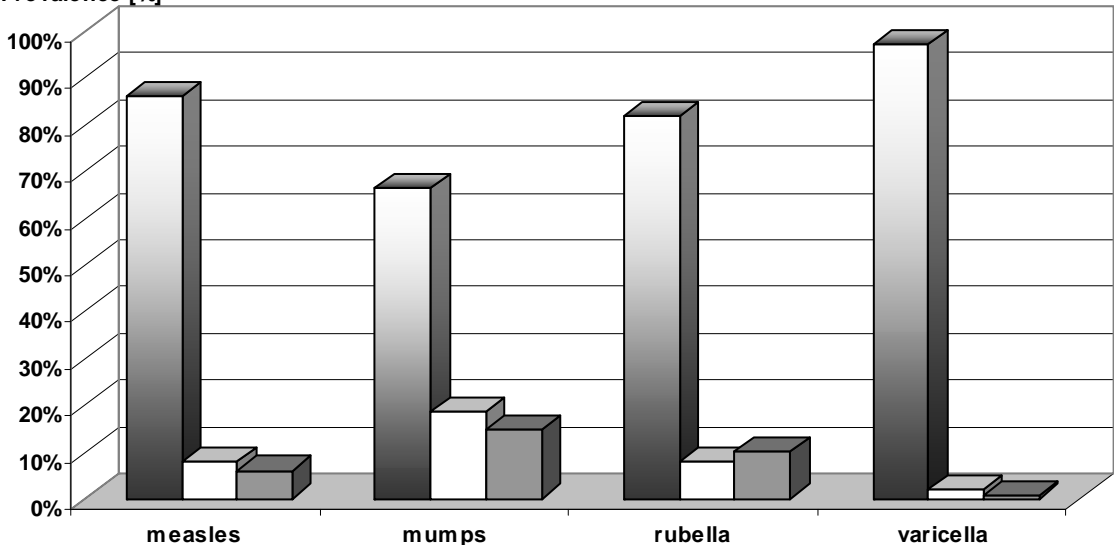

■ sufficient immunity

□ insufficient / low-level immunity

■ no immunity

Supplement: MOESM2 [file 9502432]
